# Supplementary material for: The influence of crystal packing on the solid state fluorescence behavior of alkyloxy substituted phenyleneethynylenes
Source: Royal Society of Chemistry journal article supplement (doi:10.1039/b902937k), 2009-01-01
Supplement: b902937k.pdf [file b902937k.pdf]

Table S1 Crystal structure data for adduct of 1,4-bis(phenylethynyl)-2,5-bis(alkyloxy)benzenes.\*

| Compound                       | C1                               | C2                                | C3                                | C4                                | C5                                | C6                                |
|--------------------------------|----------------------------------|-----------------------------------|-----------------------------------|-----------------------------------|-----------------------------------|-----------------------------------|
| Empirical formula              | C <sub>12</sub> H <sub>9</sub> O | C <sub>13</sub> H <sub>11</sub> O | C <sub>14</sub> H <sub>13</sub> O | C <sub>15</sub> H <sub>15</sub> O | C <sub>16</sub> H <sub>17</sub> O | C <sub>17</sub> H <sub>19</sub> O |
| Formula wt                     | 169.19                           | 183.22                            | 197.24                            | 211.27                            | 225.30                            | 239.32                            |
| Cell setting                   | Monoclinic                       | Monoclinic                        | Monoclinic                        | Monoclinic                        | Monoclinic                        | Monoclinic                        |
| Space group                    | C2/c                             | C2/c                              | P2(1)/c                           | P2(1)/n                           | P2(1)/n                           | P2(1)/n                           |
| a (Å)                          | 15.4950(5)                       | 13.0543(5)                        | 5.78560(10)                       | 6.2637(2)                         | 6.2298(2)                         | 6.2970(2)                         |
| b (Å)                          | 11.0758(4)                       | 11.0691(4)                        | 14.9764(4)                        | 21.4804(6)                        | 22.1029(6)                        | 22.7824(8)                        |
| c (Å)                          | 10.6108(3)                       | 15.2735(5)                        | 13.3619(3)                        | 9.2590(2)                         | 10.0247(3)                        | 10.6411(2)                        |
| α (°)                          | 90                               | 90                                | 90                                | 90                                | 90                                | 90                                |
| β (°)                          | 102.3920(10)                     | 109.434(2)                        | 90.1120(10)                       | 93.187(1)                         | 99.168(2)                         | 105.493(1)                        |
| γ (°)                          | 90                               | 90                                | 90                                | 90                                | 90                                | 90                                |
| Cell volume (Å <sup>3</sup> )  | 1778.59(10)                      | 2081.27(13)                       | 1157.77(5)                        | 1243.84(6)                        | 1362.73(7)                        | 1471.11(7)                        |
| Z                              | 8                                | 8                                 | 4                                 | 4                                 | 4                                 | 4                                 |
| F (000)                        | 712                              | 776                               | 420                               | 452                               | 484                               | 516                               |
| ρ (g/cm <sup>3</sup> )         | 1.264                            | 1.169                             | 1.132                             | 1.128                             | 1.098                             | 1.081                             |
| Crystal size (mm)              | 0.35 x 0.30 x 0.30               | 0.35 x 0.30 x 0.25                | 0.35 x 0.30 x 0.30                | 0.35 x 0.25 x 0.25                | 0.35 x 0.35 x 0.20                | 0.30 x 0.25 x 0.25                |
| No. of measured                | 6893                             | 12036                             | 15485                             | 12331                             | 14626                             | 5968                              |
| No. of independent reflections | 1684                             | 1965                              | 2191                              | 2323                              | 2586                              | 2087                              |
| Range for data collection θ(°) | 2.28 - 25.68                     | 2.56 - 25.69                      | 2.04 - 25.69                      | 2.91-25.65                        | 1.84 - 25.68                      | 1.79 - 23.24                      |
| Range of h, k, l               | -18 to 18                        | -15 to 15                         | -7 to 6                           | -7 to 6                           | -6 to 7                           | -6 to 6                           |
|                                | -12 to 13                        | -13 to 13                         | -18 to 18                         | -26 to 26                         | -26 to 26                         | -25 to 25,                        |
|                                | -12 to 11                        | -18 to 16                         | -16 to 16                         | -11 to 11                         | -12 to 12                         | -6 to 11                          |
| R <sub>1</sub>                 | 0.036                            | 0.043                             | 0.042                             | 0.039                             | 0.052                             | 0.045                             |
| wR <sub>2</sub>                | 0.091                            | 0.110                             | 0.112                             | 0.099                             | 0.153                             | 0.115                             |
| S                              | 1.103                            | 1.026                             | 1.016                             | 1.026                             | 1.113                             | 0.952                             |
| No. of parameters refined      | 154                              | 171                               | 188                               | 205                               | 222                               | 239                               |
| Max. eÅ <sup>-3</sup>          | 0.256                            | 0.120                             | 0.105                             | 0.122                             | 0.254                             | 0.167                             |
| CCDC No.                       | 695299                           | 695300                            | 695301                            | 695302                            | 695303                            | 695304                            |

\*Crystal data for C6 has been reported in literature earlier.<sup>17b</sup>

**NMR spectroscopic characterizations of 1,4-bis(phenylethynyl)-2,5-bis(alkyloxy) benzenes**

*1,4-bis(phenylethynyl)-2,5-bis(methoxy)benzenes*, **C1**, mp 176-178 °C. <sup>1</sup>H NMR (400 MHz, CDCl<sub>3</sub>): δ 3.89 (s, 6H), 7.03 (s, 2H), 7.34 (m, 6H), 7.57 (m, 4H). <sup>13</sup>C NMR: δ 56.66, 85.86, 95.23, 113.57, 115.86, 123.39, 128.50, 128.60, 131.89, 154.10

*1,4-bis(phenylethynyl)-2,5-bis(ethoxy)benzenes*, **C2**, mp 161-163 °C. <sup>1</sup>H NMR (400 MHz, CDCl<sub>3</sub>): δ 1.38(t, 6H), 4.11(t, 4H), 7.03 (s, 2H), 7.35 (m, 6H), 7.55 (m,4H). <sup>13</sup>C NMR: δ 14.91, 65.28, 85.89, 94.87, 114.06, 117.26, 123.04, 128.3, 128.40, 131.6, 153.48.

*1,4-bis(phenylethynyl)-2,5-bis(n-propyloxy)benzenes*, **C3**, mp 153-156 °C. <sup>1</sup>H NMR (400 MHz, CDCl<sub>3</sub>): δ 1.11(t, 6H), 1.87 (m, 4H), 4.00(t, 4H), 7.02 (s, 2H), 7.34 (m, 6H), 7.54 (m, 4H). <sup>13</sup>C NMR: δ 10.56, 22.72, 71.12, 85.91, 94.80, 114.02, 117.06, 123.46, 128.23, 128.31, 131.55, 153.62

*1,4-bis(phenylethynyl)-2,5-bis(n-butyloxy)benzenes*, **C4**, mp 122-124 °C. <sup>1</sup>H NMR (400 MHz, CDCl<sub>3</sub>): δ 1.01, (t, 6H), 1.82, (m, 4H), 1.84 (m, 4H), 4.05 (t, 4H), 7.02 (s, 2H), 7.35 (m, 6H), 7.54 (m, 4H), <sup>13</sup>C NMR: δ 13.88, 19.25, 31.37, 69.35, 85.96, 94.80, 114.00, 117.01, 123.48, 128.23, 128.31, 131.55, 153.65.

*1,4-bis(phenylethynyl)-2,5-bis(n-pentyloxy)benzenes*, **C5**, mp 121-123 °C. <sup>1</sup>H NMR (400 MHz, CDCl<sub>3</sub>): δ 0.93 (t, 6H), 1.43 (p, 4H), 1.56 (m, 4H), 1.86 (p, 4H), 4.04 ( t, 4H), 7.02 (s, 2H), 7.35 (m, 6H), 7.54 (m, 4H), <sup>13</sup>C NMR: δ 14.06, 22.48, 28.24, 29.03, 69.64, 85.96, 94.81, 113.99, 116.97, 123.47, 128.23, 128.29, 131.55, 153.64.

*1,4-bis(phenylethynyl)-2,5-bis(n-hexyloxy)benzenes*, **C6**, mp 114-115 °C. <sup>1</sup>H NMR (400 MHz, CDCl<sub>3</sub>): δ 0.80 (t, 6H), 1.35 (m, 8H), 1.57 (m,4H), 1.86 (p, 4H), 4.05 (t, 4H), 7.02 (s, 2H), 7.35 (m, 6H), 7.57(m, 4H). <sup>13</sup>C NMR: δ 14.02, 22.62, 25.73, 29.31, 31.59, 69.61, 85.97, 94.81, 113.97, 116.94, 123.47, 128.21, 128.28, 131.55, 153.64.

Table S2: Weak interactions present in the compounds **C1** to **C6**.

| Compound  | Weak interaction | Distance, (range) | Angle, (range)       | Number of unique interactions |
|-----------|------------------|-------------------|----------------------|-------------------------------|
|           |                  | H...A             | D-H...A              |                               |
| <b>C1</b> | C-H... $\pi$     | 2.78(2) - 3.04(2) | 130.7(2) - 174.4 (2) | 8                             |
| <b>C2</b> | C-H... $\pi$     | 2.81(1), 3.05(1)  | 132.7(1), 145.7(2)   | 2                             |
| <b>C3</b> | C-H... $\pi$     | 2.73(2), 3.02(2)  | 135.0(1), 140.6(1)   | 2                             |
| <b>C4</b> | C-H... $\pi$     | 2.79(1) - 2.95(1) | 145.0(2), 152.6(2)   | 2                             |
|           | C-H...O          | 2.70(1)           | 144.5(2)             | 1                             |
| <b>C5</b> | C-H... $\pi$     | 2.84(2), 2.88(2)  | 156.2(2), 140.6(1)   | 2                             |
| <b>C6</b> | C-H... $\pi$     | 2.72(2) - 2.88(1) | 132.1(1)- 160.0(1)   | 3                             |

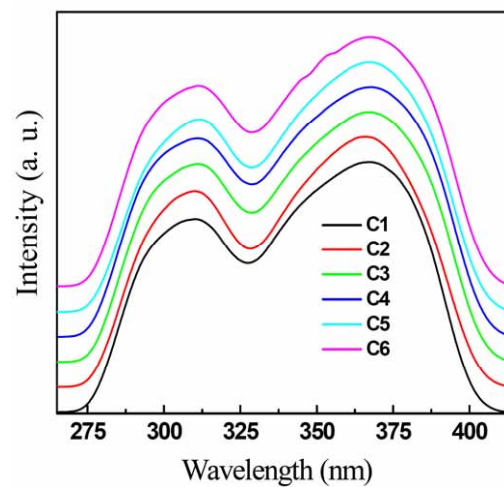

Figure S1. Excitation spectra recorded at 445 nm for the dilute solutions of the alkyloxy substituted (phenyleneethynylene)s in toluene.

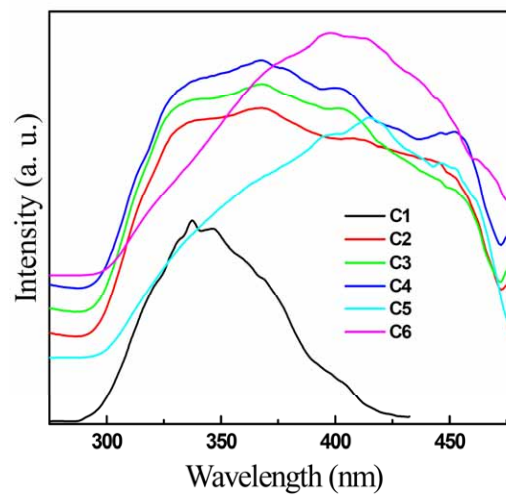

Figure S2: Excitation spectra (emission collected at 480 nm) for the crystals of oligo(phenyleneethynylene)s **C2** to **C6**, Excitation spectrum for molecule **C1** is recorded by collecting emission at 440 nm.

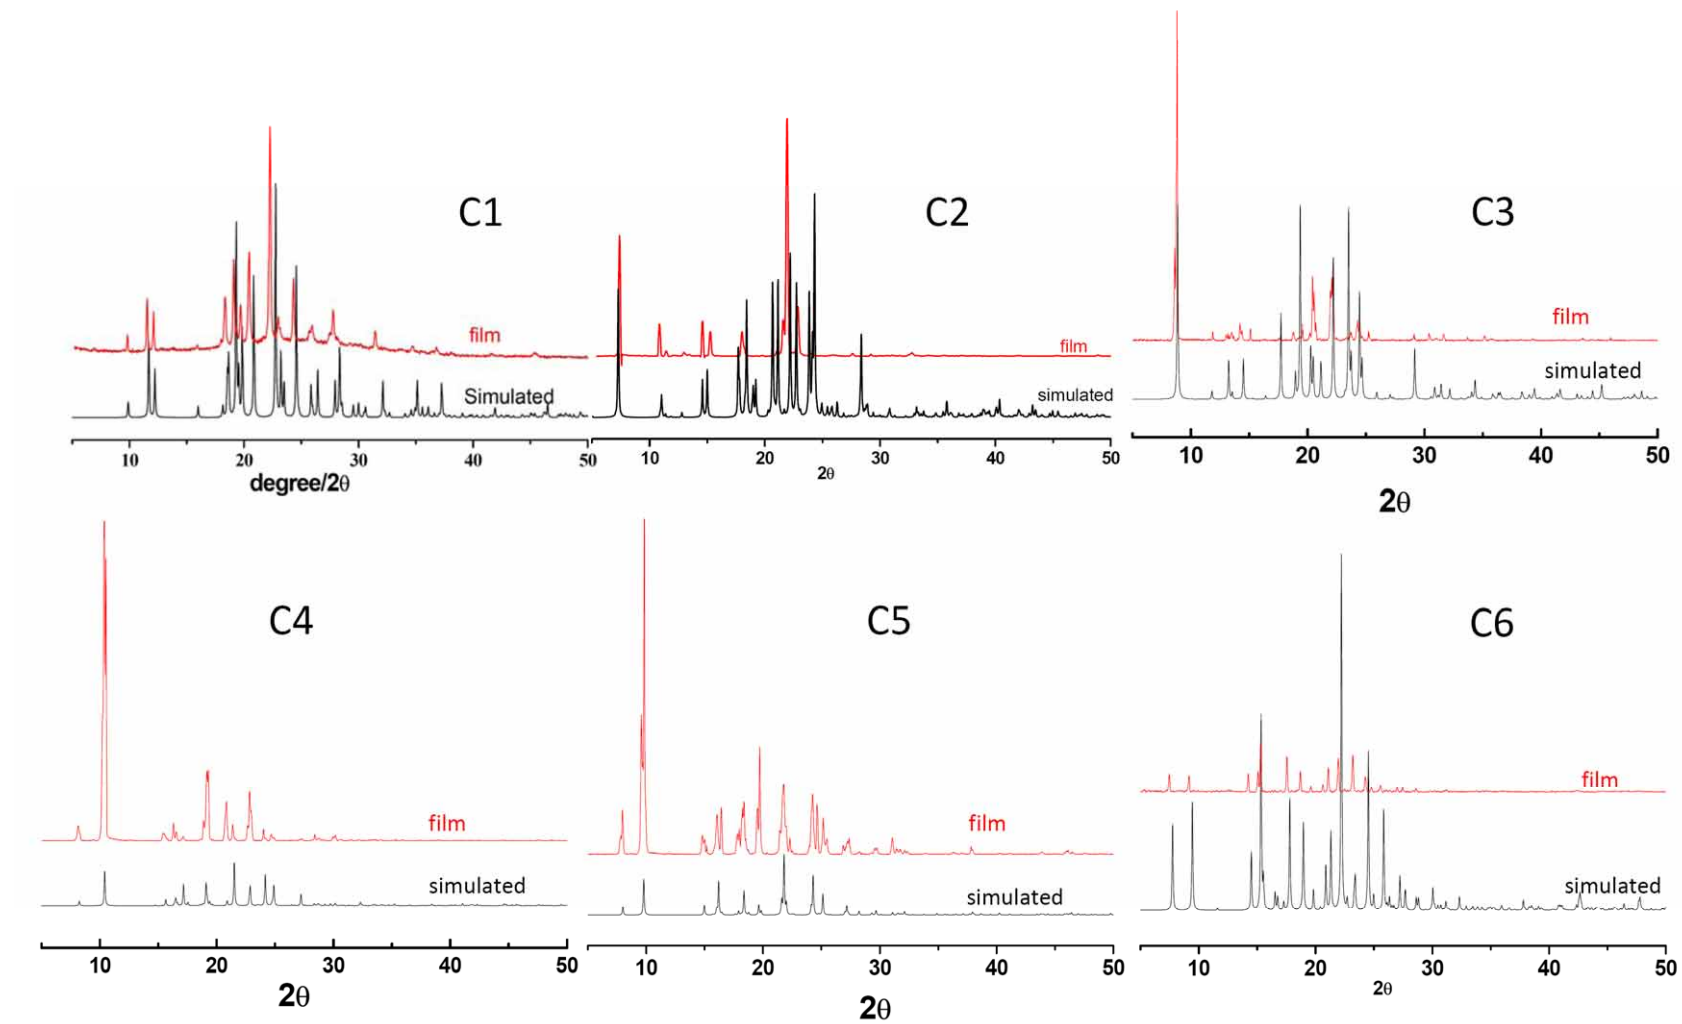

Figure S3: Comparison of XRD pattern recorded from the films of C1 – C6 used for fluorescence studies and that simulated from the single crystal X-ray diffraction data.

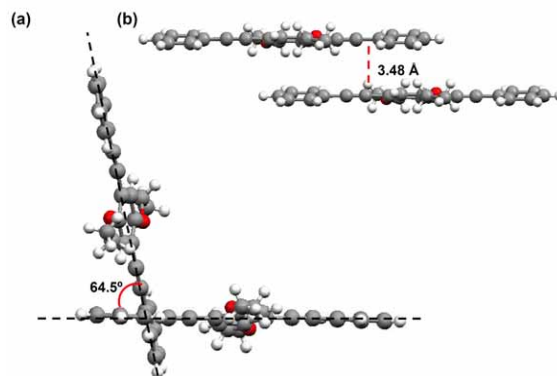

Figure S4: Intermolecular interaction possibility in molecule C2 (a) a cross stacked pair of molecules and (b) a parallel slipped pair.

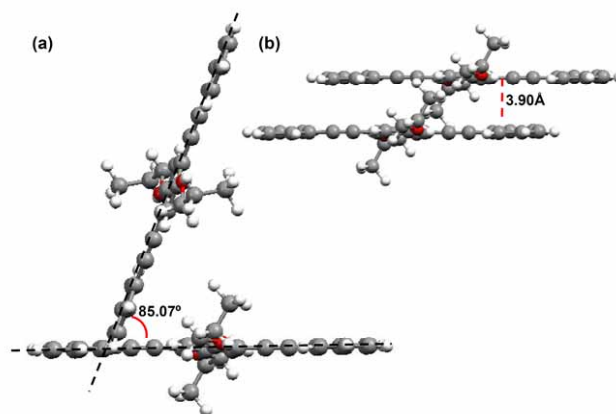

Figure S5: Intermolecular interaction possibility in molecule C3 (a) cross stacked pair of molecules and (b) a parallel slipped pair.

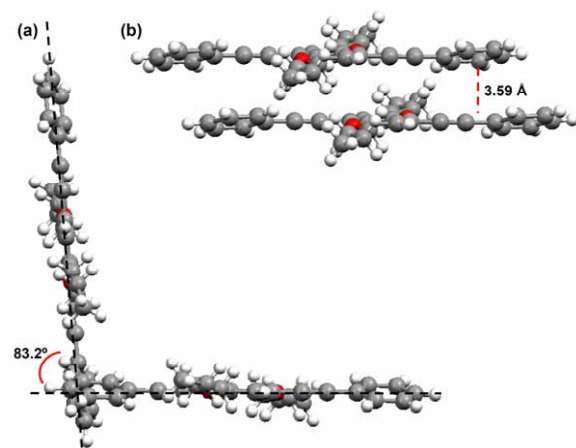

Figure S6: Intermolecular interaction possibility in molecule C4 (a) cross stacked pair of molecules and (b) a parallel slipped pair.

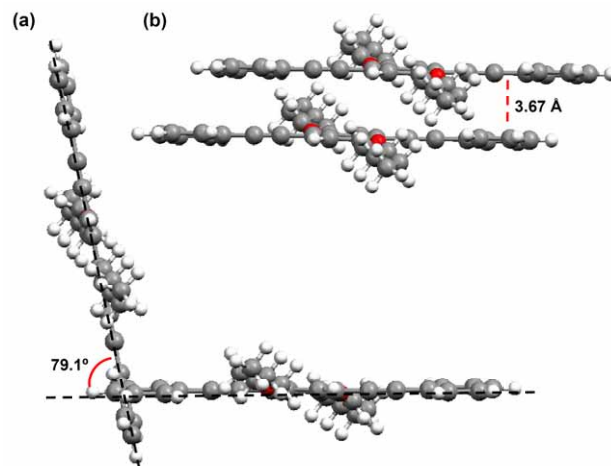

Figure S7: Intermolecular interaction possibility in molecule C5 (a) cross stacked pair of molecules and (b) a parallel slipped pair.

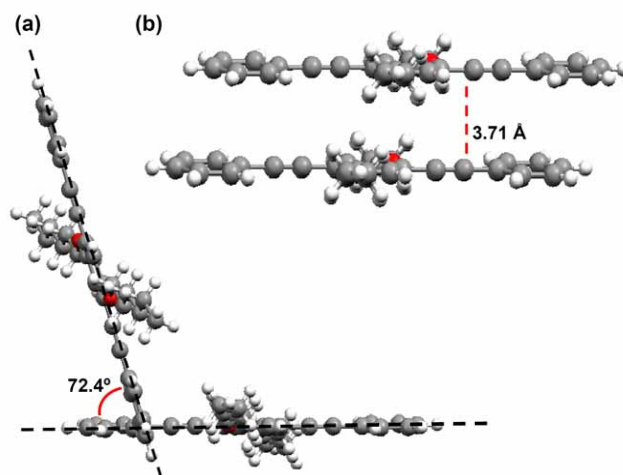

Figure S8: Intermolecular interaction possibility in molecule C6 (a) cross stacked pair of molecules and (b) a parallel slipped pair.
